# Supplementary material
Source: publisher figshare collection journal article supplement (https://gsapubs.figshare.com/articles/dataset/_/16934569)

Xiang Ge, Chuanbo Shen, Renjie Zhou, Peng He, Jianxin Zhao, and Yuexing Feng, 2021, Tracing fluid evolution in sedimentary basins with calcite geochemical, isotopic and U-Pb geochronological data: Implications for petroleum and mineral resource accumulation in the Nanpanjiang Basin, South China: GSA Bulletin, <https://doi.org/10.1130/B36168.1>.

## Supplemental Material

**Figure S1.** Tectonic reconstruction maps for SE Asia

**Table S1.** Calcite LA-ICP-MS in situ U-Pb isotope data.

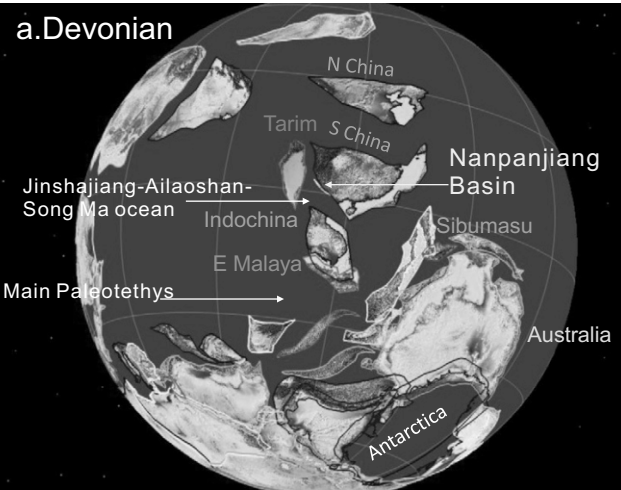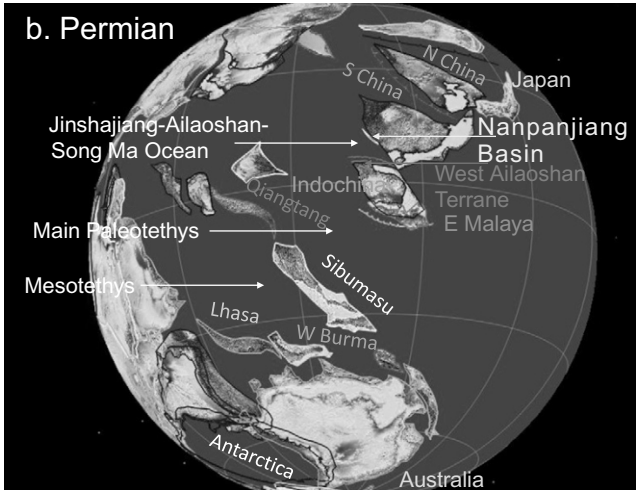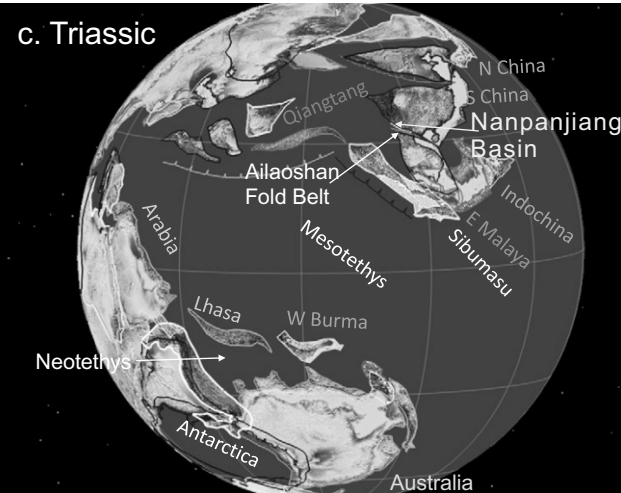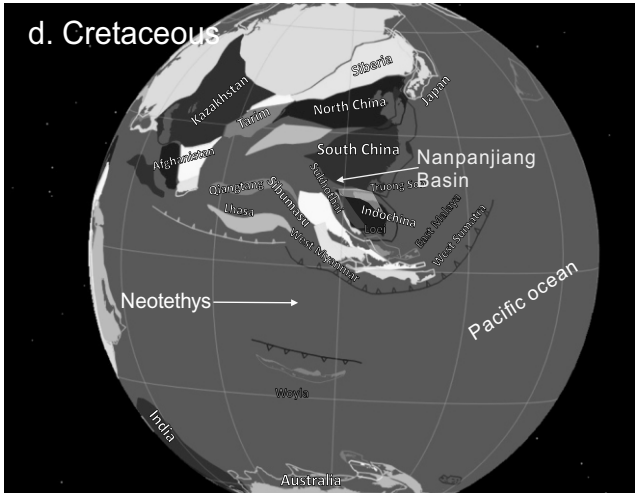

Supplement: Supplementary file 1 [file 1]
